# Supplementary material for: Molecular cloning, structure, phylogeny and expression analysis of the invertase gene family in sugarcane
Source: PubMed Central journal article supplement (PMC5481874; doi:10.1186/s12870-017-1052-0), 2017-06-23
Supplement: 12870_2017_1052_MOESM2_ESM.pdf [file 12870_2017_1052_MOESM2_ESM.pdf]

Table S2 PCR Primer Sequences and Annealing Temperature of Invertase Genes in Sugarcane

| Sorghum   |                  | Forward primer and Reverse primer(5'-3') |                                    | Tm |
|-----------|------------------|------------------------------------------|------------------------------------|----|
| Gene name | Gene ID          |                                          |                                    |    |
| SbN/AINV1 | Sobic.004G172700 | ATGGAGCTGGCTGTCGGCGGCGGGAT               | TTAGTTTGTCCATGATGCGGACCGCTTCA      | 57 |
| SbN/AINV2 | Sobic.004G255600 | ATGATGGAGGCGGCGGCGAT                     | TTACCCTGTCCAAGAGGCCGACCTCC         | 61 |
| SbN/AINV3 | Sobic.005G058800 | TTTTCCCCTGCTTTCAGTTTTGTT                 | CATGGTATACACTTTCTGTCCTATTT         | 58 |
| SbN/AINV4 | Sobic.004G024500 | ATGGTACAATGTACTCAACCTCCTCCCCA            | TCATGGGCACGAGTTGGAGCG              | 62 |
| SbN/AINV5 | Sobic.004G163800 | AACAAGGCGCCAATGGGGATC                    | TGCTGCGAGAACTCACACAATGTATG         | 55 |
| SbN/AINV6 | Sobic.003G153800 | ATGAGTGGTCAAACCCCGATGG                   | TCACCCAATATGTGACTTGGCTG            | 53 |
| SbN/AINV7 | Sobic.001G391600 | ATGAGTGGTCAAACCCCGATGG                   | TCACCCAATATGTGACTTGGCTG            | 56 |
| SbCWINV1  | Sobic.001G099700 | ATGGCGATCAGGACTTGGGCATCGGT               | CTACTTCACGTCAGCGGTGATCTTAGCCGAC    | 59 |
| SbCWINV2  | Sobic.K040900    | ATGAGTGGTCAAACCCCGATGG                   | TCACCCAATATGTGACTTGGCTG            | 58 |
| SbCWINV3  | Sobic.K041100    | GATCATGTACACGGGCGTGAACCG                 | TCAAGCTCCATTCATGAGTGGCTTCTTC       | 59 |
| SbCWINV4  | Sobic.004G166700 | ATGAGTGGTCAAACCCCGATGG                   | TCACCCAATATGTGACTTGGCTG            | 62 |
| SbCWINV5  | Sobic.K041000    | ATGAGTGGTCAAACCCCGATGG                   | TCACCCAATATGTGACTTGGCTG            | 60 |
| SbCWINV6  | Sobic.K041200    | ATGTACTACAAAGGGTGGTACCATTTC              | CTAGATCTTGGCCCCGTTTCATGA           | 59 |
| SbCWINV7  | Sobic.003G440900 | ATGTCCATGGCCCTCAGGC                      | TAACTGTCTGTGCTTATCCCTTCTT          | 53 |
| SbCWINV8  | Sobic.006G255500 | ATGAACGGGAAGCAGAGCCTACGCC                | TTACAGTGTGCCACACGGTAGTCTTCTTC      | 53 |
| SbCWINV9  | Sobic.006G255400 | ATGGCAGCACTTCTCCTTGCTATACG               | CTAATACATCTCGCTGTGGCACATGTTCA      | 59 |
| SbCWINV10 | Sobic.006G255600 | CTCTCGTCCCGCATCGACCATG                   | TTAATAGGATTCACTTTCGTCTTTAGATTGAGAC | 55 |
| SbVINV1   | Sobic.004G004800 | ATGGTGCCGGACCAGTGGTA                     | TCAGATGTCCGTGACCATGTAGTCG          | 59 |
| SbVINV2   | Sobic.006G160700 | ATGAGTGGTCAAACCCCGATGG                   | TCACCCAATATGTGACTTGGCTG            | 54 |
