# Supplementary material for: Molecular cloning, structure, phylogeny and expression analysis of the invertase gene family in sugarcane
Source: PubMed Central journal article supplement (PMC5481874; doi:10.1186/s12870-017-1052-0), 2017-06-23
Supplement: 12870_2017_1052_MOESM3_ESM.pdf [file 12870_2017_1052_MOESM3_ESM.pdf]

Table S3 Real time PCR primers for 13 invertase genes in sugarcane

| Gene Name | Forward primer          | Reverse primer           |
|-----------|-------------------------|--------------------------|
| ShN/AINV6 | GACCGTACCACTTGATGAGAACA | TCCACCACAGTCCAGAATCCA    |
| ShN/AINV5 | GGAACGGGACTTGGGTAAAGGA  | AGACCACCATTGCCACCTACA    |
| ShN/AINV4 | TGCTGTGGCTGCTGGTGG      | CCGCCTTGCCGTCGTAGT       |
| ShN/AINV2 | GCTCAACTACGACCAGGTG TTC | GCAGCAGCAGCGTCTTCA       |
| ShN/AINV1 | CGCCGCTCACTCGTCTTCT     | CCCTCACAAACACTTGGTCGTAGT |
| ShN/AINV3 | GTTGGTGAGATGCCTCTGAAGAT | GTCAGCAGCCACAGAAGAACT    |
| ShcWINV10 | GTGTCGTTGTCTGCTCTTCT    | TCGGATCGTTCTGCCAGTTCT    |
| ShcWINV9  | GGAGCAGAAGCAGGACAAGGA   | GGAGGCTGGTAGTGGTAGGC     |
| ShcWINV7  | GGCAGCAGGCAGCAGTAG      | CCCACACGGTAGTCTTCTTCAAC  |
| ShcWINV8  | GGCTGAACTGGACGGCTACA    | TGGTGGAGGCATTGGAAGAGT    |
| ShcWINV3  | GCCACCTGCGGTACGACTAC    | AATCCCAGCCCAGCCCTTG      |
| ShcWINV6  | AGAGGCAAGGCGGTCACT      | GCTAGGCGAGAAACGGTAACG    |
| ShVINV1   | GGCTGCCATCCTCATCATTATT  | GGCGGATTGTGTGTGTAGTT     |
