# Supplementary material for: Molecular cloning, structure, phylogeny and expression analysis of the invertase gene family in sugarcane
Source: PubMed Central journal article supplement (PMC5481874; doi:10.1186/s12870-017-1052-0), 2017-06-23
Supplement: 12870_2017_1052_MOESM4_ESM.pdf [file 12870_2017_1052_MOESM4_ESM.pdf]

Table S4 Motif distribution in invertase family

| Invertase Family | Motif number | Length (aa) | Consensus sequence                                                                                    | E value  |
|------------------|--------------|-------------|-------------------------------------------------------------------------------------------------------|----------|
| Acid invertase   | 1            | 34          | RRILWGWANESDSEADDVAKGWAGIQAIPTIWL                                                                     | 9.3e-537 |
|                  | 2            | 23          | NYQVQNIAFPKNPSDPLLREWVK                                                                               | 4.1e-437 |
|                  | 3            | 41          | WGNIVWGHSVSTD LINWIALEPAIEPTIPFDINGCWSGSAT                                                            | 7.7e-384 |
|                  | 4            | 36          | TISLRTLIDHSIVESFGQGGRTCIMSRVYPEHAITD                                                                  | 8.3e-433 |
|                  | 5            | 29          | HGGVGPFGWLWVMASGNMREHTAVFFRVFK                                                                        | 3.2e-410 |
|                  | 6            | 21          | DPDGKQLLQWPVEEIIETLRGK                                                                                | 7.3e-307 |
|                  | 7            | 15          | YYKGMYPHFYQYNPH                                                                                       | 5.8e-316 |
|                  | 8            | 29          | LMCTDPTKSSTKPNLYKPTYGGFVDVDIE                                                                         | 2.0e-287 |
|                  | 9            | 21          | PIPPPQGINANQFRDPTTAW                                                                                  | 1.4e-293 |
|                  | 10           | 21          | WLRDYGNFYASKTFFDPAKR                                                                                  | 6.3e-267 |
|                  | 11           | 29          | AHMYVFNNGTDDVKVSKLEAWEMKKAQMN                                                                         | 6.8e-255 |
|                  | 12           | 21          | SPHYRTAYHFQPPKNWINDPN                                                                                 | 2.9e-205 |
|                  | 13           | 15          | SNATGMWECPDFFPV                                                                                       | 1.4e-236 |
|                  | 14           | 21          | TRCDYYMIGTYDDKTDTFVPD                                                                                 | 3.9e-180 |
|                  | 15           | 29          | SAEVDGYGAAVYRSRDFKHWERVRHPLH                                                                          | 4.4e-112 |
| Neutral/alkaline |              |             | EMPLKICYPAMENHEWQIVTGCDPKNTRWSYHNGGSWPVLLWQLTAACI                                                     |          |
| invertase        | 1            | 50          | K                                                                                                     | 2.5e-736 |
|                  | 2            | 50          | SYHMRSYYWLDLDFQQLNDIYRYKTEEYSHTAVNKFNVYPEQIPDWLDFDFMP                                                 | 2.4e-699 |
|                  | 3            | 50          | RLILNLCLSEGFDTFPTLLCTDGCCMIDRRMGIYGYPIEQALFYMALRC                                                     | 4.9e-674 |
|                  | 4            | 50          | NYDQVFVRDFVPSALAFMNGETEIVKNFLLHTLQLQSWEKMVDCFKLGQ<br>ARRAIEVAEQRLAKDKWPEYYDGKLGRYVGKQARKFQTWSIAGYLVAK | 3.3e-639 |
|                  | 5            | 50          | MM                                                                                                    | 2.7e-607 |
|                  | 6            | 50          | ETLVADFGESAIGRVAPVDSGFWWIILLRAYTKWTGDNLSLAETPDCQKGM                                                   | 6.9e-607 |

|    |    |                                                     |          |
|----|----|-----------------------------------------------------|----------|
| 7  | 50 | GGYFIGNVQPAHMDFRWFCLGNCWAIVSSLATPEQAEAIMDLIEEKWDDL  | 7.7e-591 |
| 8  | 50 | HTPASTHFNSFEPHPIVNEAWEALRRSVVYFCGQPVGTVAAVDHSCEEVL  | 2.6e-346 |
| 9  | 21 | MLKPQNEGKDFIEHINTRLHA                               | 4.0e-122 |
| 10 | 15 | GAMPASFKVHHNPKD                                     | 4.6e-122 |
| 11 | 21 | LEDPSHLM MISCEEDKHVKPP                              | 1.3e-104 |
| 12 | 21 | QRINVERQRSFDDRSWSEL SH                              | 7.0e-88  |
| 13 | 50 | DENHDSL PKPEKRTRMHHIERHRSCVVTLS DMELNGLQPRLLQTIEKSP | 5.2e-61  |
| 14 | 50 | KTAAGTATRLFPRLPHPHPPYGRRLPFLVSAASQS QASQTGPATPVPVP  | 4.3e-58  |
| 15 | 21 | MRRVSSHVSLADPDDFNLTRL                               | 9.4e-42  |

---
